# Supplementary material for: Progressive Brain Degeneration From Subjective Cognitive Decline to Amnestic Mild Cognitive Impairment: Evidence From Large-Scale Anatomical Connection Classification Analysis
Source: Frontiers journal article supplement (doi:10.3389/fnagi.2021.687530), 2021-07-12
Supplement: Data_Sheet_1.PDF [file Data_Sheet_1.PDF]

# Progressive brain degeneration from subjective cognitive decline to amnesic mild cognitive impairment: evidence from large-scale anatomical connection classification analysis

Supplementary Material

Table S1 Between-group differences in network properties at different thresholds (network-level)

| FN threshold | Groups | Eglobal      | Elocal       | CC          | PL          |
|--------------|--------|--------------|--------------|-------------|-------------|
| 1            | HC     | 11.06 ± 2.64 | 15.47 ± 3.33 | 0.02 ± 0.01 | 0.10 ± 0.02 |
|              | SCD    | 9.61 ± 2.17  | 14.17 ± 2.99 | 0.02 ± 0.01 | 0.11 ± 0.03 |
|              | aMCI   | 7.97 ± 2.16  | 12.44 ± 2.90 | 0.02 ± 0.01 | 0.13 ± 0.04 |
| 2            | HC     | 10.63 ± 2.64 | 15.96 ± 3.51 | 0.02 ± 0.01 | 0.10 ± 0.02 |
|              | SCD    | 9.61 ± 2.17  | 14.36 ± 3.17 | 0.02 ± 0.01 | 0.11 ± 0.03 |
|              | aMCI   | 7.97 ± 2.16  | 12.69 ± 3.16 | 0.03 ± 0.01 | 0.13 ± 0.04 |
| 3            | HC     | 10.63 ± 2.64 | 16.29 ± 3.86 | 0.03 ± 0.01 | 0.10 ± 0.02 |
|              | SCD    | 9.61 ± 2.17  | 14.49 ± 3.27 | 0.02 ± 0.01 | 0.11 ± 0.03 |
|              | aMCI   | 7.96 ± 2.17  | 12.77 ± 3.34 | 0.03 ± 0.01 | 0.14 ± 0.04 |
| 4            | HC     | 10.63 ± 2.64 | 16.43 ± 3.94 | 0.03 ± 0.01 | 0.10 ± 0.02 |
|              | SCD    | 9.60 ± 2.18  | 14.67 ± 3.50 | 0.03 ± 0.01 | 0.11 ± 0.03 |
|              | aMCI   | 7.94 ± 2.18  | 12.92 ± 3.65 | 0.03 ± 0.01 | 0.14 ± 0.04 |
| 5            | HC     | 10.63 ± 2.64 | 16.45 ± 4.00 | 0.03 ± 0.01 | 0.10 ± 0.02 |
|              | SCD    | 9.60 ± 2.19  | 14.56 ± 3.72 | 0.03 ± 0.01 | 0.11 ± 0.03 |
|              | aMCI   | 7.91 ± 2.21  | 12.67 ± 3.79 | 0.03 ± 0.01 | 0.14 ± 0.04 |
| 10           | HC     | 10.47 ± 2.67 | 15.36 ± 4.56 | 0.03 ± 0.01 | 0.10 ± 0.02 |
|              | SCD    | 9.35 ± 2.26  | 12.90 ± 4.50 | 0.03 ± 0.01 | 0.11 ± 0.03 |
|              | aMCI   | 7.51 ± 2.38  | 11.37 ± 4.50 | 0.03 ± 0.01 | 0.15 ± 0.06 |

The green part of the table is significantly different from the red part, while the unlabeled color part is not significantly different from any other group.

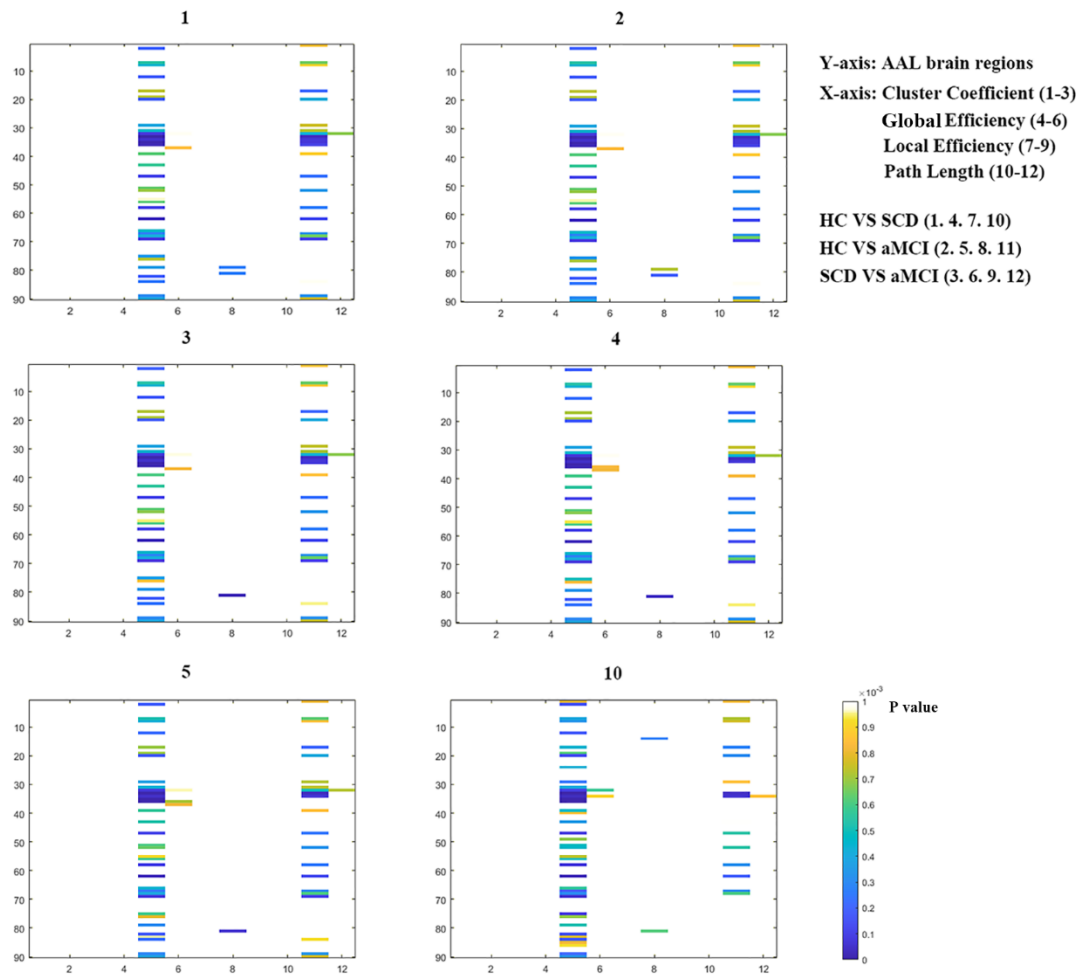

Figure S1. Between-group differences in network properties at different thresholds (at the nodal level). Y-axis of each figure indicates 90 brain regions, x-axis represents different group contrasts on different indexes at the nodal level. More specifically, 1 (cluster coefficient), 4(global efficiency), 6 (local efficiency), 10 (path length) represents contrasts between HC and SCD; 2(cluster coefficient), 5(global efficiency), 8(local efficiency), 11 (path length) represent contrasts between HC and aMCI; 3(cluster coefficient), 6(global efficiency), 9(local efficiency), 12(path length) represent contrast between SCD and aMCI. Numbers above figures represent different FN thresholds.

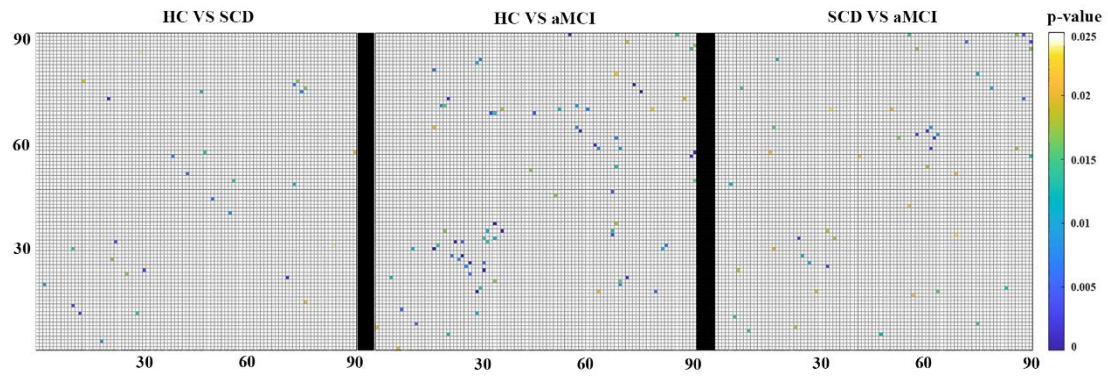

Figure S2 The between-group differences of structural connectivity. Y-axis and X-axis of each figure indicates 90 brain regions. The value in each cell represents p value of group contrast on FN of each white matter across groups.
